# Supplementary material for: Perfluoroalkyl-substituted conjugated polymers as electron acceptors for all-polymer solar cells: the effect of diiodoperfluoroalkane additives
Source: Royal Society of Chemistry journal article supplement (doi:10.1039/c6ta00962j), 2016-01-01
Supplement: c6ta00962j1.pdf [file c6ta00962j1.pdf]

## Supporting Information

### Perfluoroalkyl-Substituted Conjugated Polymers as Electron Acceptors for All-Polymer Solar Cells: the Effect of Diiodoperfluoroalkane Additives

Andong Zhang,<sup>a</sup> Qiang Wang,<sup>b</sup> Ralf A. A. Bovee,<sup>b</sup> Cheng Li,<sup>\*a</sup> Jianqi Zhang,<sup>\*c</sup> Yi Zhou,<sup>d</sup>  
Zhixiang Wei,<sup>c</sup> Yongfang Li,<sup>d</sup> René A. J. Janssen,<sup>b</sup> Zhaohui Wang,<sup>\*a</sup> and Weiwei Li<sup>\*a</sup>

<sup>a</sup> Beijing National Laboratory for Molecular Sciences, CAS Key Laboratory of Organic Solids, Institute of Chemistry, Chinese Academy of Sciences, Beijing, 10090, China.

\*E-mail: licheng1987@iccas.ac.cn, wangzhaohui@iccas.ac.cn, liweiwei@iccas.ac.cn

<sup>b</sup> Molecular Materials and Nanosystems & Institute for Complex Molecular Systems, Eindhoven University of Technology, P.O. Box 513, 5600 MB Eindhoven, The Netherlands

<sup>c</sup> National Center for Nanoscience and Technology, Chinese Academy of Sciences, Beijing, 100190, China. E-mail: zhangjq@nanoctr.cn

<sup>d</sup> Laboratory of Advanced Optoelectronic Materials, College of Chemistry, Chemical Engineering and Materials Science, Soochow University, Suzhou, Jiangsu 215123, China

#### Contents

1. <sup>1</sup>H-NMR of the DPP polymers
2. GPC
3. Optical absorption spectra of pure polymers
4. Cyclic voltammetry
5. DFT calculations
6. 2D-GIWAXS patterns of PDPP5T thin film
7. All-polymer solar cells fabricated from CHCl<sub>3</sub> solution without additives
8. All-polymer solar cells fabricated from CHCl<sub>3</sub> solution containing additives
9. PTB7-Th:PDPP2TzFBDT and PDPP2TDTP:PDPP2TzFBDT cells
10. Calibration of PL intensity by absorption spectra

## 1. $^1\text{H-NMR}$ of the DPP polymers

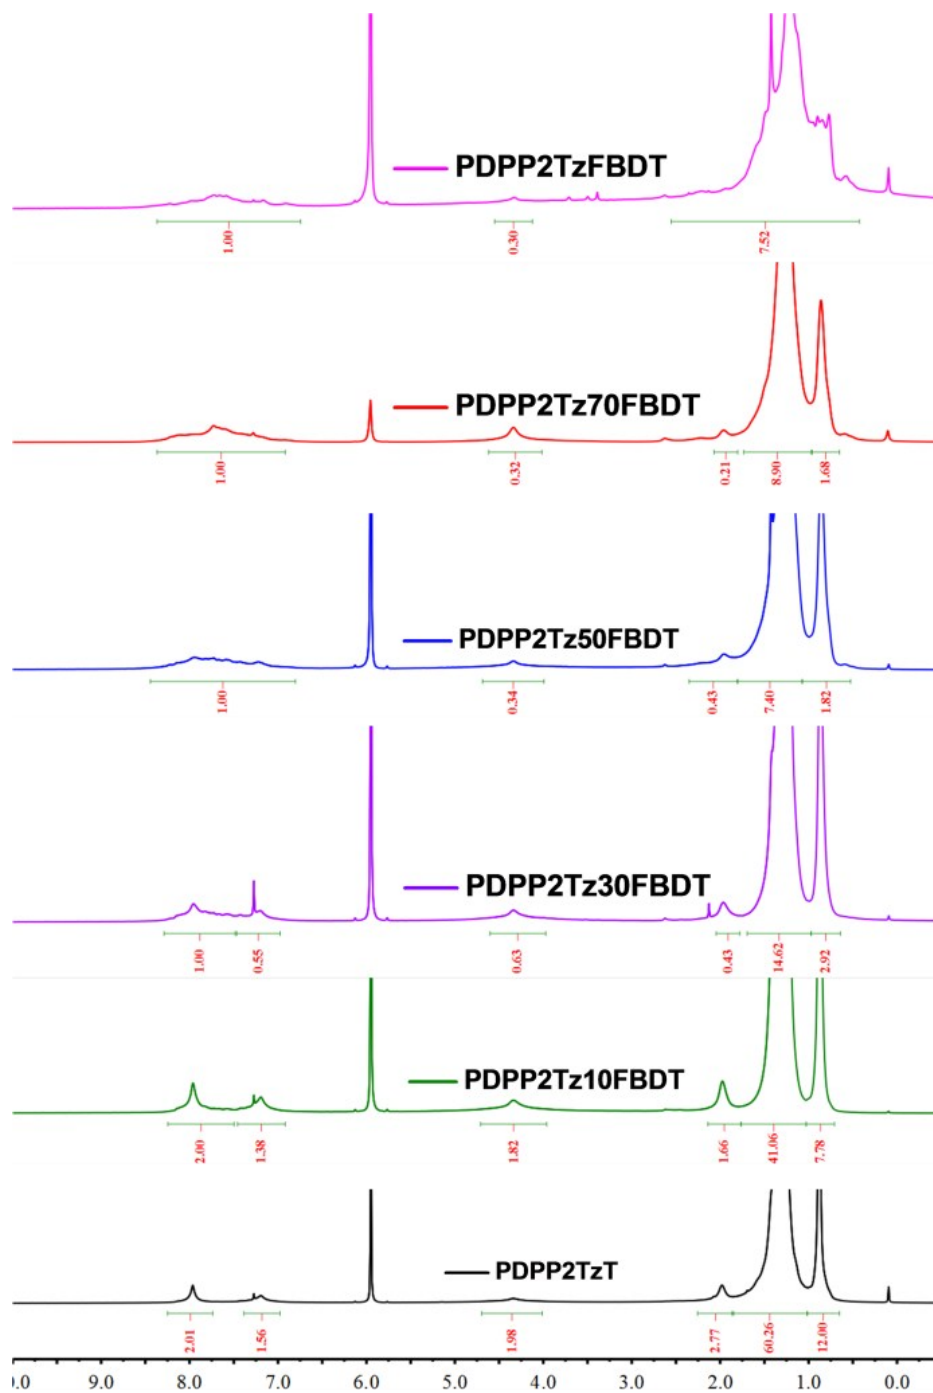

**Fig. S1**  $^1\text{H-NMR}$  spectra of the DPP polymers.

## 2. GPC

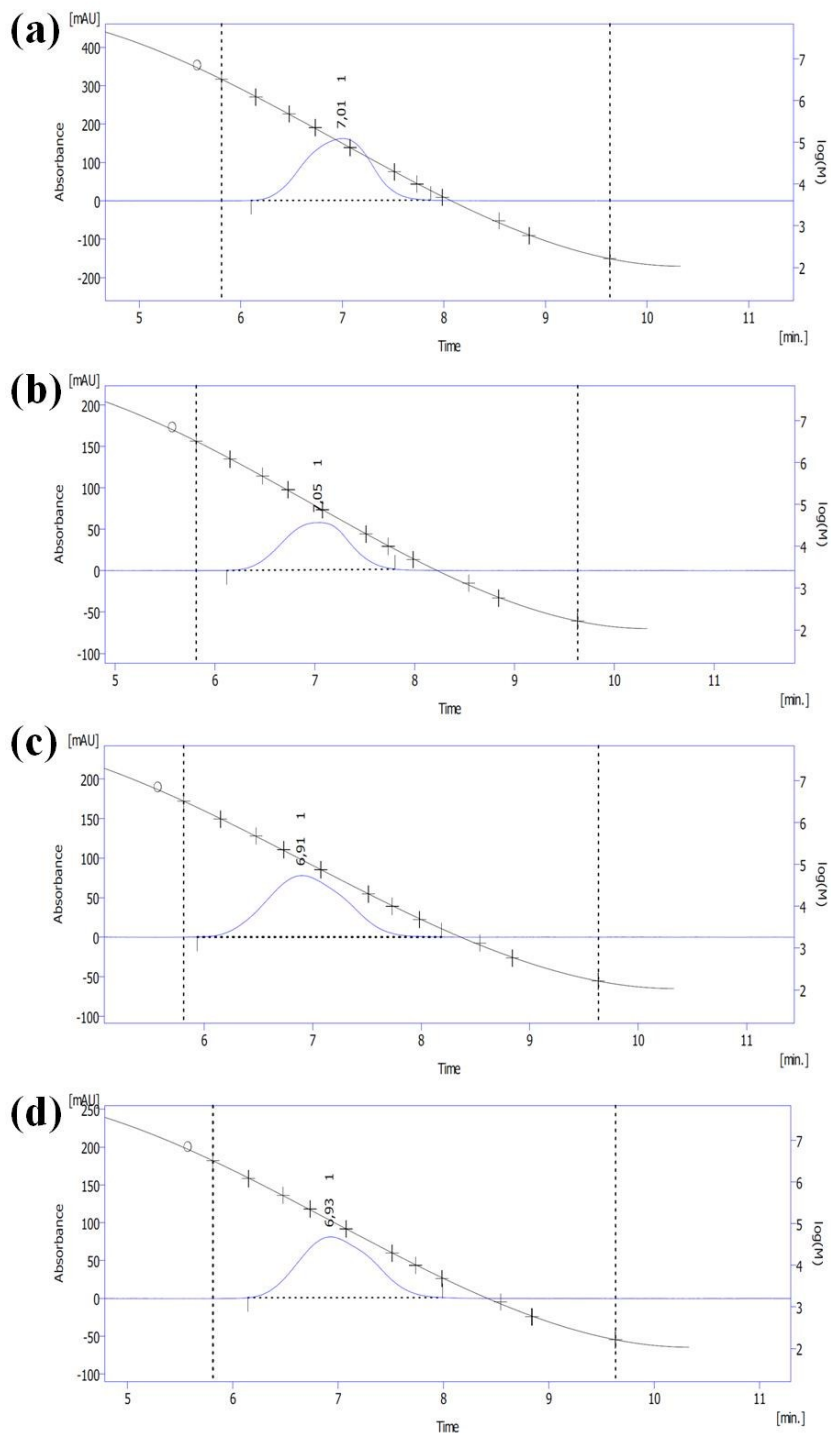

**Fig. S2** GPC recorded at 140 °C with *o*-DCB as eluent for (a) PDPP2Tz10FBDT, (b) PDPP2Tz30FBDT, (c) PDPP2Tz50FBDT and (d) PDPP2Tz70FBDT.

### 3. Optical absorption spectra of pure polymers

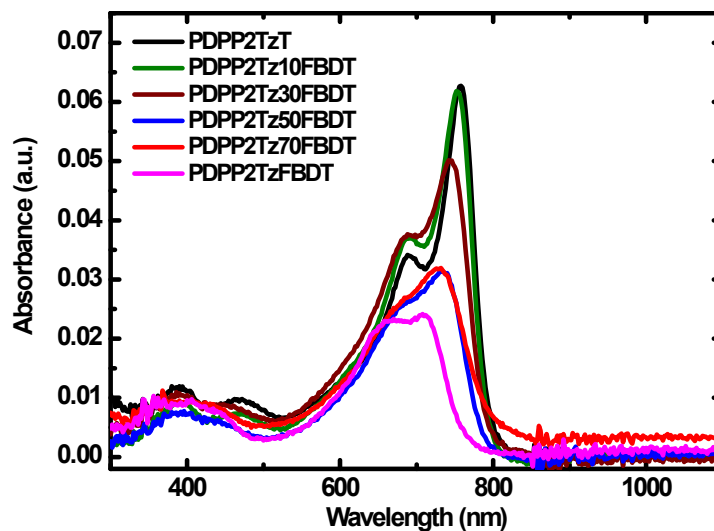

**Fig. S3** Optical absorption spectra of the DPP polymers in  $\text{CHCl}_3$  solution. The concentration is  $0.001 \text{ g L}^{-1}$ .

### 4. Cyclic voltammetry

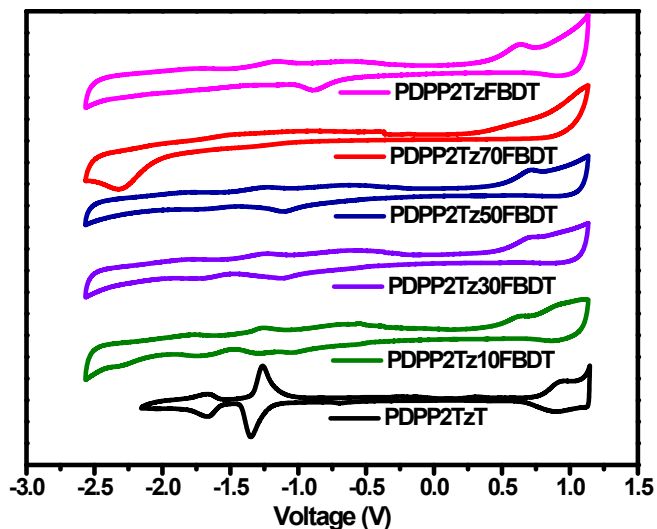

**Fig. S4** Cyclic voltammograms of the DPP polymers in this work. Potential vs.  $\text{Fc}/\text{Fc}^+$ .

## 5. DFT calculations

Density function theory (DFT) calculations were performed at the B3LYP/6-31G\* level of theory by using the Gaussian 09 program package.

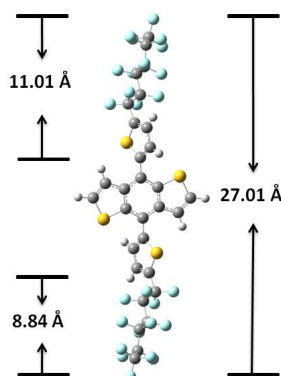

**Fig. S5** Computed molecular structure of FBBDT.

## 6. 2D-GIWAXS pattern of PDPP5T thin film

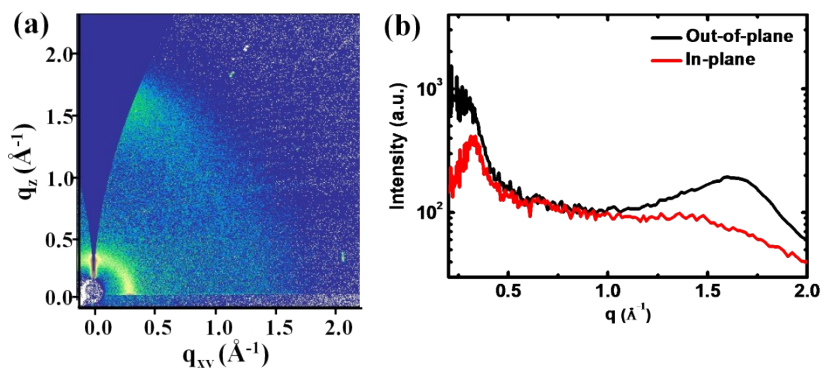

**Fig. S6** Characteristics of PDPP5T thin film spin coated from  $\text{CHCl}_3$ . (a) 2D-GIWAXS pattern and (b) the out-of-plane and in-plane cuts of the corresponding 2D-GIWAXS patterns. The crystallographic parameter of PDPP5T is calculated:  $q_{xy} = 0.33 \text{ \AA}^{-1}$  and  $d = 19.0 \text{ \AA}$  for lamellar stacking peak (100);  $q_z = 1.64 \text{ \AA}^{-1}$  and  $d = 3.83 \text{ \AA}$  for  $\pi$ - $\pi$  stacking peak (010).

## 7. All-polymer solar cells fabricated from $\text{CHCl}_3$ solution without additives

In this part we summarize the results on solar cell fabricated from pure  $\text{CHCl}_3$  solution without additives, report the hole and electron mobility from SCLC measurements, and analyze the morphology by AFM.

**Table S1** Characteristics of PDPP5T:DPP-polymer (1:1) solar cells fabricated from  $\text{CHCl}_3$  solution.

| Acceptor      | Thickness<br>[nm] | $J_{sc}$<br>[mA cm <sup>-2</sup> ] | $V_{oc}$<br>[V] | FF   | PCE<br>[%] |
|---------------|-------------------|------------------------------------|-----------------|------|------------|
| PDPP2TzT      | 100               | 0.51                               | 0.75            | 0.36 | 0.13       |
| PDPP2Tz10FBDT | 100               | 0.46                               | 0.79            | 0.31 | 0.11       |
| PDPP2Tz30FBDT | 80                | 0.60                               | 0.81            | 0.34 | 0.17       |
| PDPP2Tz50FBDT | 85                | 1.16                               | 0.77            | 0.39 | 0.39       |
| PDPP2Tz70FBDT | 80                | 0.72                               | 0.79            | 0.42 | 0.24       |
| PDPP2TzFBDT   | 90                | 0.66                               | 0.75            | 0.40 | 0.20       |

**Table S2** Hole and electron mobility in all-PSCs by SCLC measurement. The thin films were fabricated from CHCl<sub>3</sub> solution.

| Polymer       | $\mu_h$<br>(cm <sup>2</sup> V <sup>-1</sup> s <sup>-1</sup> ) | $\mu_e$<br>(cm <sup>2</sup> V <sup>-1</sup> s <sup>-1</sup> ) | $\mu_h/\mu_e$ |
|---------------|---------------------------------------------------------------|---------------------------------------------------------------|---------------|
| PDPP2TzT      | $2.7 \times 10^{-4}$                                          | $8.7 \times 10^{-6}$                                          | 31            |
| PDPP2Tz10FBDT | $1.3 \times 10^{-4}$                                          | $3.0 \times 10^{-6}$                                          | 43            |
| PDPP2Tz30FBDT | $9.1 \times 10^{-5}$                                          | $7.0 \times 10^{-6}$                                          | 13            |
| PDPP2Tz50FBDT | $2.4 \times 10^{-4}$                                          | $8.7 \times 10^{-6}$                                          | 28            |
| PDPP2Tz70FBDT | $9.5 \times 10^{-5}$                                          | $3.2 \times 10^{-6}$                                          | 30            |
| PDPP2TzFBDT   | $2.3 \times 10^{-4}$                                          | $2.0 \times 10^{-7}$                                          | 1150          |

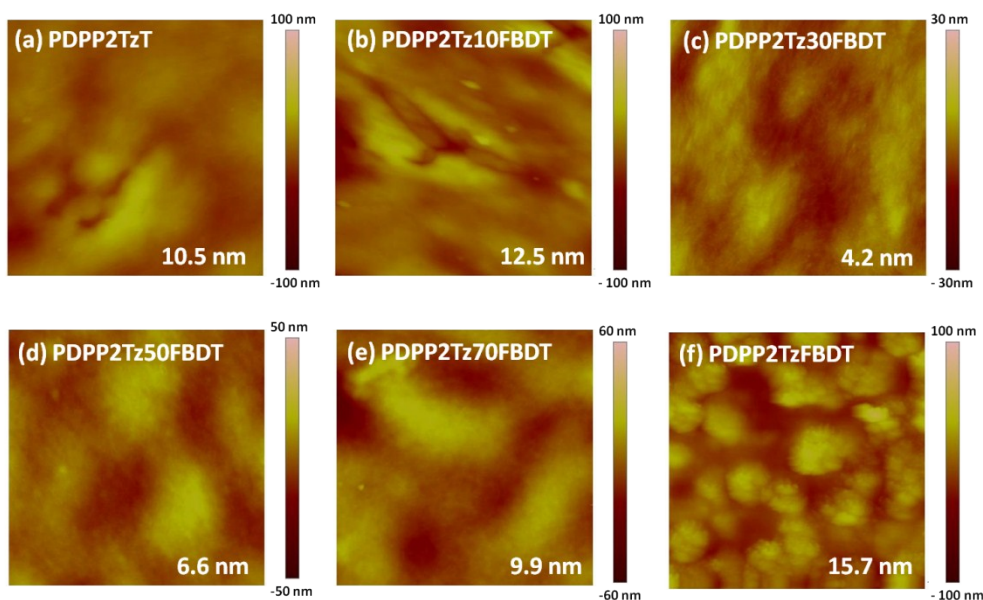

**Fig. S7** AFM height images ( $3 \times 3 \mu\text{m}^2$ ) of PDPP5T:DPP-polymer (1:1) blends spin coated from  $\text{CHCl}_3$  solution. The root mean square (RMS) roughness is also included in the panels.

## 8. All-polymer solar cells fabricated from $\text{CHCl}_3$ solution containing additives

**Table S3** Characteristics of PDPP5T:PDPP2TzFBTD solar cells for different solvent with additives and different layer thickness.

| Solvent                                                          | Thickness<br>[nm] | $J_{\text{sc}}$<br>[ $\text{mA cm}^{-2}$ ] | $V_{\text{oc}}$<br>[V] | FF   | PCE<br>[%] |
|------------------------------------------------------------------|-------------------|--------------------------------------------|------------------------|------|------------|
| $\text{CHCl}_3$ : $\text{IC}_4\text{F}_8\text{I}$ 5%             | 70                | 2.4                                        | 0.65                   | 0.37 | 0.56       |
| $\text{CHCl}_3$ : $\text{IC}_4\text{F}_8\text{I}$ 10%            | 70                | 6.4                                        | 0.68                   | 0.37 | 1.6        |
| $\text{CHCl}_3$ : $\text{IC}_4\text{F}_8\text{I}$ 20%            | 65                | 6.5                                        | 0.68                   | 0.40 | 1.8        |
| $\text{CHCl}_3$ : $\text{IC}_6\text{F}_{12}\text{I}$ 5%          | 70                | 7.4                                        | 0.69                   | 0.42 | 2.1        |
| $\text{CHCl}_3$ : $\text{IC}_6\text{F}_{12}\text{I}$ 10%         | 60                | 6.9                                        | 0.67                   | 0.46 | 2.1        |
| $\text{CHCl}_3$ : $\text{IC}_6\text{F}_{12}\text{I}$ 10%         | 75                | 6.9                                        | 0.67                   | 0.45 | 2.1        |
| $\text{CHCl}_3$ : $\text{IC}_6\text{F}_{12}\text{I}$ 10%         | 110               | 5.6                                        | 0.65                   | 0.36 | 1.3        |
| $\text{CHCl}_3$ : $\text{IC}_6\text{F}_{12}\text{I}$ 20%         | 70                | 7.2                                        | 0.67                   | 0.44 | 2.1        |
| $\text{CHCl}_3$ :1-CN: $\text{IC}_6\text{F}_{12}\text{I}$ 3%/10% | 70                | 0.82                                       | 0.69                   | 0.42 | 0.24       |

## 9. PTB7-Th:PDPP2TzFBTD and PDPP2T-DTP:PDPP2TzFBTD cells

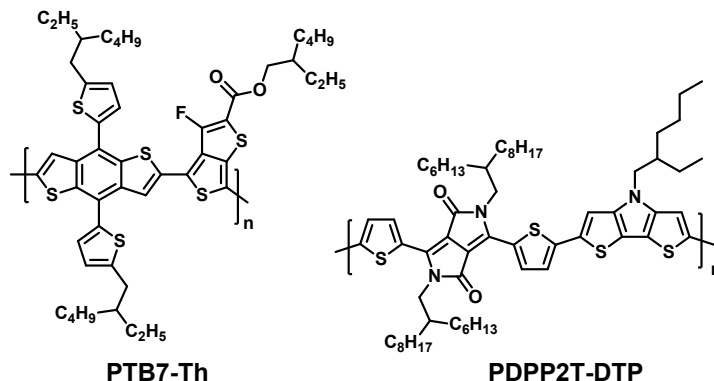

**Fig. S8** Chemical structures of the donor polymers PTB7-Th and PDPP2T-DTP.

**Table S4** Characteristics of donor (PTB7-Th or PDPP2T-DTP):PDPP2TzFBTD solar cells for different solvent with additives and different layer thickness. The thickness of active layers is around 65 nm.

| Donor   | Solvent                                                  | $J_{\text{sc}}$<br>[ $\text{mA cm}^{-2}$ ] | $V_{\text{oc}}$<br>[V] | FF   | PCE<br>[%] |
|---------|----------------------------------------------------------|--------------------------------------------|------------------------|------|------------|
| PTB7-Th | $\text{CHCl}_3$ :1-CN 3%                                 | 5.7                                        | 0.83                   | 0.45 | 2.1        |
|         | $\text{CHCl}_3$ : $\text{IC}_6\text{F}_{12}\text{I}$ 10% | 6.9                                        | 0.77                   | 0.46 | 2.5        |

|            |                                                          |     |      |      |     |
|------------|----------------------------------------------------------|-----|------|------|-----|
| PDPP2T-DTP | CHCl <sub>3</sub> :1-CN 3%                               | 2.7 | 0.52 | 0.42 | 0.6 |
|            | CHCl <sub>3</sub> :IC <sub>6</sub> F <sub>12</sub> I 10% | 4.8 | 0.50 | 0.43 | 1.0 |

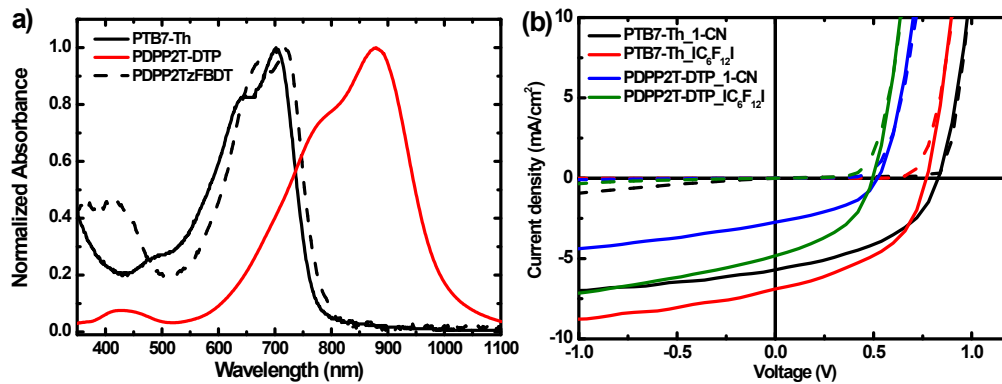

**Fig. S9** (a) Optical absorption spectra of PTB7-Th, PDPP2T-DTP and PDPP2TzFBBDT. (b)  $J$ - $V$  characteristics in dark (dashed lines) and under white light illumination (solid lines) of the donor:PDPP2TzFBBDT cells fabricated from CHCl<sub>3</sub> solution with 3% 1-CN or 10% IC<sub>6</sub>F<sub>12</sub>I.

## 10. Calibration of PL intensity by absorption spectra

The PL intensity in Fig. 6 was calibrated by absorption spectra of the same thin films. PDPP5T was set as the standard sample and the intensity of other PL spectra was calibrated by using the following equation:

$$I_{\text{PL}}(\text{sample}) = I_{\text{PL}}(\text{measured}) \times I_{\text{abs}}^{760 \text{ nm}}(\text{PDPP5T}) / I_{\text{abs}}^{760 \text{ nm}}(\text{sample})$$

in which  $I_{\text{abs}} = 1 - 10^{-\text{OD}}$ , where OD is the absorbance intensity.

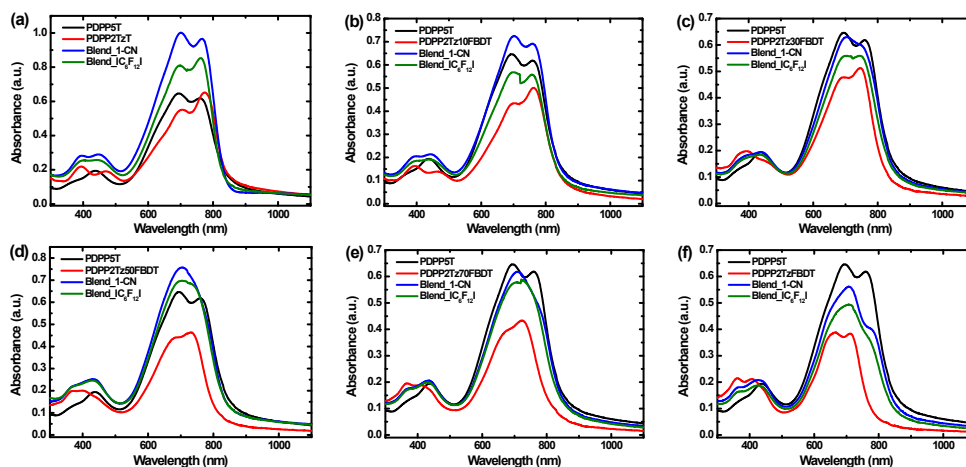

**Fig. S10** Absorption spectra of the pure DPP polymers and PDPP5T:DPP-polymer (1:1) thin films. These thin films were further used to perform PL measurement as shown in Fig. 6.
